1      Metabolic Model-Based Analysis of the Emergence of  
2      Bacterial Cross-Feeding through Extensive Gene Loss

3

4

Colin P McNally<sup>1</sup> and Elhanan Borenstein<sup>1,2,3\*</sup>

5

6      <sup>1</sup> Department of Genome Sciences, University of Washington, Seattle, Washington, U.S.A.

7      <sup>2</sup> Department of Computer Science and Engineering, University of Washington, Seattle, Washington, U.S.A.

8      <sup>3</sup> Santa Fe Institute, Santa Fe, New Mexico, U.S.A.

9      \* Corresponding author, [elbo@uw.edu](mailto:elbo@uw.edu)

10

## 11 **Abstract**

12           Metabolic dependencies between microbial species are common and have a significant impact on  
13 the assembly and resilience of microbial communities. However, the origins of such metabolic  
14 dependencies, the evolutionary forces that drive metabolic cross-feeding, and the impact of metabolic and  
15 genomic architecture on their emergence are not clear. To address these questions, we developed a novel  
16 simulation-based framework coupling a model of reductive evolution with a multi-species genome-scale  
17 model of microbial metabolism. We used this framework to model the evolution of a two-species  
18 microbial community, simulating thousands of independent evolutionary trajectories and investigating the  
19 link between genome reductive evolution and the emergence of metabolic interactions. Surprisingly, even  
20 though our model does not impose explicit selection for cooperation, metabolic dependencies emerged in  
21 nearly half of all evolutionary runs. Evolved dependencies involved cross-feeding of a diverse set of  
22 metabolites at varying frequencies, reflecting various constraints imposed by the metabolic network  
23 architecture. We additionally found metabolic ‘missed opportunities’, wherein species failed to capitalize  
24 on metabolites made available by their partners. When cross-feeding did evolve, it generally emerged  
25 immediately after a metabolite became available, but a complete dependence on such cross-fed  
26 metabolites often evolved relatively slowly. Examining the genes deleted and retained in each  
27 evolutionary trajectory and the timing of gene deletion events along these trajectories, we were further  
28 able to identify both genome-wide properties and specific gene retentions that were associated with  
29 metabolic phenotypes. Our findings provide insight into the evolution of cooperative metabolic  
30 interaction among microbial species, offering a unique view into the way such relationships could emerge  
31 in natural settings.

## 32 **Introduction**

33           Most microorganisms in nature do not live in isolation but are rather part of complex  
34 communities [1]. Such communities inhabit a wide range of environments and have attracted significant  
35 interest in recent years due to an increased appreciation of their role in human health and environmental  
36 stewardship as well as their potential applications in industry, agriculture, and medicine [2–5]. The  
37 various microbial species that form these communities not only share a common environment, but rather  
38 interact with other community members in various ways including competition for extracellular nutrients,  
39 cooperation through metabolite cross-feeding, signaling, biofilm formation, and antimicrobial secretion  
40 [1,6]. Such interactions allow community members to impact each other’s behavior and play an important  
41 role in shaping community structure and activity. A better understanding of how these interactions  
42 emerge through ecological and evolutionary dynamics, how they are maintained or lost, and how they  
43 impact community-level behavior is therefore crucial for both understanding the forces that have shaped  
44 current natural communities and for designing synthetic communities or targeted modulation of natural  
45 communities.

46           Perhaps the most intriguing form of microbial interaction is inter-species cooperation. The  
47 prevalence of cooperative interaction is evident from the large number of microbes that cannot be  
48 individually cultured, suggesting that they are reliant on symbiotic interactions with other members of  
49 their communities [7]. In the context of metabolism, cooperation often takes the form of cross-feeding,  
50 where one species secretes metabolites that other species uptake and utilize. Indeed, metabolic cross-  
51 feeding has been found to occur in a wide variety of environments and between diverse species [8], often  
52 benefiting both partners [9]. For example, *Bifidobacterium* species in the gut microbiota regularly cross-  
53 feed fermentation products and partial digestion byproducts of polysaccharides to butyrate-forming  
54 bacteria [10,11]. Furthermore, evidence suggests that metabolic cooperation drives species co-occurrence  
55 in diverse microbial communities [12].

56           Notably, however, metabolic cooperation is not limited to complex communities and has also  
57 been demonstrated in small two- or three-species communities, such as those occupying various insect  
58 hosts. For example, it was shown that the two endosymbionts that occupy a sharpshooter insect (and the  
59 insect host) each lack necessary steps of several amino acid synthesis pathways, and consequently only  
60 when the three organisms grow together can they synthesize the entire complement of amino-acids  
61 [13,14]. Similarly, it was shown that two endosymbiotic bacteria that inhabit a *Cicadoidea* host had  
62 recently diverged into 3 species, with metabolic complementarity between the two recently split lineages  
63 [15]. Studying the facultative symbionts of another host, the sap-feeding whitefly, it was shown that pairs  
64 of symbionts with greater metabolic complementarity are more likely to co-occur in a host [16]. Such  
65 tightly coupled metabolic systems, where two or three species strongly depend on each other for survival,  
66 could be viewed as an idealized model of microbial cooperation and accordingly have been extensively  
67 studied. Similar tight cross-feeding behavior between a small number of species has been successfully  
68 engineered in laboratory conditions, for example allowing auxotrophic strains of *Escherichia coli* to  
69 survive in co-culture [17–19]. Cross-feeding has also been engineered between different strains of a yeast  
70 species [20], and even between species as divergent as yeast and algae [21].

71           This prevalence of cooperation is, however, somewhat surprising given a large body of work  
72 suggesting that cooperation should be challenging to evolve [22,23]. Specifically, the emergence of  
73 cheaters or the potential loss of species that provide essential metabolites could hinder the evolution of  
74 cooperative interaction. One possible explanation for the emergence of cooperation in the face of these  
75 challenges is the Black Queen hypothesis [24], positing that symbiotic interactions through gene loss  
76 could evolve when a function is biosynthetically costly but has a leaky benefit [25]. This mechanism,  
77 however, may not be applicable in fixed communities with small population size, where selection is  
78 relatively weak [26]. In such communities (such as insect endosymbionts), cooperation likely emerges not  
79 through selection by rather by chance as a consequence of extreme genome reduction [27]. Indeed, most

80 insect endosymbionts have extremely small genomes (some of which are the smallest bacterial genomes  
81 known) that are majorly reduced compared to their closest free-living relatives [28].

82         Importantly, however, despite the prevalence and diversity of such obligate endosymbionts, the  
83 process and determinants through which extensive long term genome reduction gives rise to metabolic  
84 cross-feeding are not clear and their study is challenging. Experimental evolution studies have aimed to  
85 examine the evolution of metabolic cooperation, evolving a population seeded with a single species and  
86 demonstrating the emergence of cooperative interactions between divergent polymorphic subsets of the  
87 populations [29,30]. Similar experimental evolution studies that have focused on populations seeded with  
88 multiple species that were initially cooperative have also shown that such species evolve to be both more  
89 efficient at and more dependent on that cooperation [31,32]. However, such evolutionary experiments are  
90 limited in both duration of evolution (which precludes studying extreme long term genomic reduction)  
91 and number of replicates (which hinders development of a more comprehensive view of microbial  
92 evolution and identification of general principles in the emergence of species interaction). Computational  
93 methods, on the other hand, allow long time scales to be easily modeled and thus may be more applicable.  
94 For example, prior studies determined the dispersal properties that favor cross-feeding by modeling the  
95 co-evolution of microbial strains where the various genotypes determined which compounds were  
96 secreted to a shared environment [33]. Another study used a mathematical model of two species that can  
97 increase each other's fitness, aiming to identify the processes underlying the evolution of cooperation  
98 [22]. Such models have also been used to study the impact of genetic variability on synergistic effects  
99 between partner species [34], and to investigate the effect of population density on the emergence of  
100 cross-feeding [35]. These studies have produced useful insights, but tend to explicitly model interaction in  
101 a non-mechanistic way and thus are limited in utility for studying how a genomic evolutionary process  
102 (e.g., genome reduction through genetic drift) could lead to the evolution of cross-feeding.

103         To address this gap, in this study, we utilized a model of microbial evolution over a *long time*  
104 *scale* coupled with a *mechanistic model* of multi-species microbial growth. Our model is inspired by a

105 previous computational study that modeled reductive evolution of a single endosymbiont species [36].  
106 The authors investigated how historical contingency between gene deletions affects future genome  
107 reduction and the nature of the minimal genomes that result. This framework models metabolism on a  
108 genome scale and is able to simulate long evolutionary time scales, but is also amenable to highly  
109 replicate simulations to infer general principles. In the work we present here, we extended this  
110 evolutionary framework to a co-culture model of two species, using a mechanistic model of microbial  
111 growth in co-culture which is based on a recently introduced multi-species genome-scale metabolic  
112 modeling approach [37].

113 We specifically aim to examine whether species interaction can emerge without explicit selection,  
114 and which mechanisms can drive a selfishly evolving species to support a dependent species. To this end,  
115 we model the evolution of cross-feeding in a simple multi-species community. Notably, we do not model  
116 the process by which an evolving population bifurcates into multiple subpopulations, but rather explicitly  
117 assume the community harbors two interacting but evolutionary isolated species (e.g., following an initial  
118 split), each undergoing an extreme reductive evolution process. We further assume that these two species  
119 co-exist over a long time scale, without one outcompeting the other. Using genome scale metabolic  
120 models to model each of these evolving species, we were able to directly investigate how the  
121 architecture of the metabolic and genetic network affects the evolution of cross-feeding interactions, and  
122 how evolved genomes reflect the type of interaction that emerged. Using this framework, we simulated  
123 thousands of independent evolutionary trajectories, tracked the emergence of metabolic cross-feeding,  
124 and carefully analyzed the evolving species. We aimed to address several fundamental questions  
125 concerning the evolution of cooperation under such an evolutionary regime. Can species interaction  
126 emerge without explicit selection for it? How do species evolve to depend on available metabolites and  
127 how rapidly will such dependencies emerge? What are the mechanisms that drive a selfishly evolving  
128 species to support a dependent species? How does the architecture of the metabolic and genetic networks  
129 affect the evolution of such interactions, and how do the evolved genomes reflect the type of interaction

130 that emerged? And finally, how does evolution in a community shape co-evolutionary dynamics?  
131 Addressing these questions could have profound impact both on our understanding of the evolution of  
132 species interactions and on our ability to design and construct stable microbial communities for medical,  
133 agricultural, and industrial application.

134

## 135 **Results**

### 136 **A framework for modeling the evolution of species interactions**

137 To study the emergence of metabolic species interaction in bacteria we developed a  
138 computational framework that integrates models of microbial co-evolution, metabolic activity, and  
139 ecological interaction (Fig 1). Briefly, in this framework, we model a community comprised of two  
140 generalist species growing in a shared environment (and that can therefore exchange metabolites) that go  
141 through a reductive evolution process. Our reductive evolution model is inspired by a previously  
142 introduced model of reductive evolution of a single endosymbiont species [36]. In our model evolution is  
143 an iterative process in which a gene is first chosen at random from either of the two species for deletion  
144 (Fig 1A). The fitness effect of losing that gene (in the context of the community) is calculated using a co-  
145 culture metabolic model (described below). If the decrease in fitness to the species losing this gene does  
146 not exceed a predefined threshold the deletion is assumed to fix; otherwise the deletion is assumed to be  
147 selected against and is reverted. Importantly, during the course of this co-evolutionary process, the  
148 presence of each of the two species in the community can markedly impact the evolution of the other (and  
149 specially, the set of genes that can be deleted). This process repeats until no more genes can be deleted  
150 from either species.

151 Specifically, to model growth in co-culture and to determine the fitness consequence of gene  
152 deletions while accounting for the way the presence of one species in the community may impact the  
153 fitness of the other, we used a previously introduced co-culture metabolic modeling framework [37]. This  
154 framework employs dynamic Flux Balance Analysis (FBA) to predict the metabolic activity and growth

155 of two species in a shared environment over discrete time points (Fig 1B). Briefly, at each time point and  
156 for each species in the co-culture, this framework uses a genome-scale metabolic model of the species  
157 (based on its metabolic capacity as determined by the set of genes present in its genome), the current  
158 concentration of metabolites in the environment, and a Flux Balance Analysis to predict the species'  
159 behavior, including its growth rate and the rate at which it imports and excretes various metabolites [38]  
160 (Fig 1C). The estimated growth rates of the two species are then used to update the abundances of the  
161 species in the community and the predicted uptake and excretion fluxes are used to update the  
162 concentration of metabolites in the shared environment. Growth is simulated over several time points and

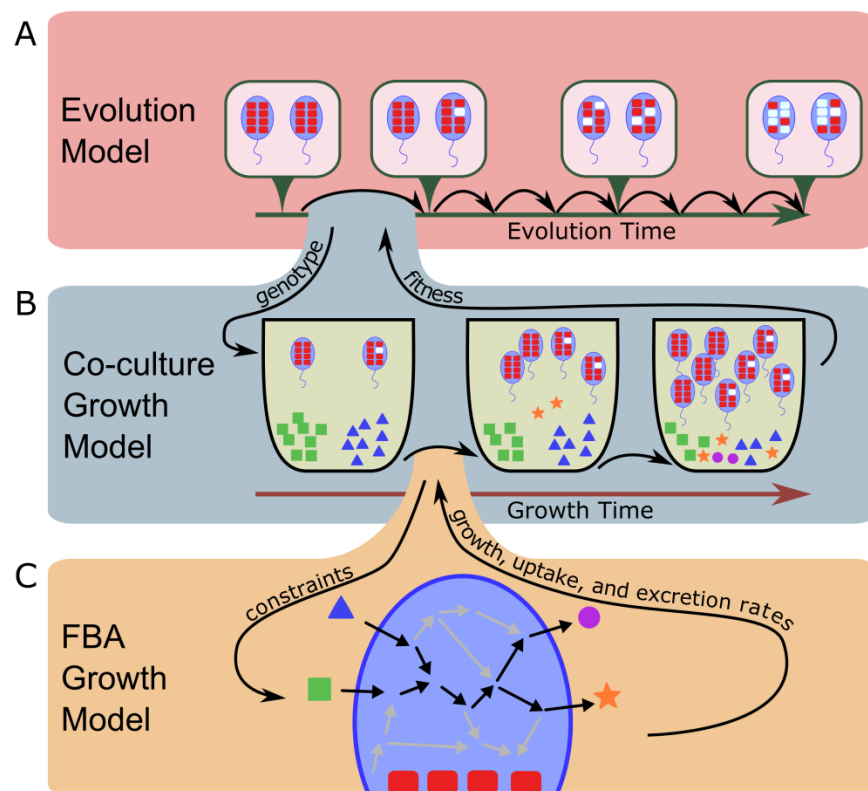

**Figure 1: A framework for modeling the evolution of species interaction.** (A) To model reductive evolution, genes are iteratively chosen at random as candidate for deletion, the fitness effect of their deletion is evaluated (using a co-culture growth model; see panel B), and if the fitness effect is relatively small, these genes are deleted. (B) The co-culture growth model simulates the growth of the two species in a well-mixed shared environment, and is based on a previously introduced dynamic multi-species model [37]. This model iteratively infers the behavior of each species in the shared environment based on an FBA approach (see panel C). The predicted growth of each species and the predicted rates at which it uptakes and excretes various metabolite are used to update the abundances of species in the co-culture and the concentration of metabolites in the shared environment over time. (C) An FBA model is used to predict the growth of each species in a given environment based on the set of metabolic reactions and constraints encoded by the species and the concentration of metabolites in its environment.



163 the growth rates of each species at the last time point are used as proxies for their fitness.

164 To classify the interaction between the two species in each community and at each evolutionary  
165 step, we also simulated and evaluated the growth of each of the two species in isolation (i.e., in mono-  
166 culture). We define a species as being dependent on its partner if it can grow in co-culture but not in  
167 mono-culture (zero fitness). Accordingly, we distinguish between three possible types of interaction a  
168 given community can exhibit: (i) *Independent* – neither species is dependent on the other, (ii) *commensal*  
169 – one species (*dependent*) is dependent on the other species but the other (*provider*) is not, and (iii)  
170 *mutualistic* – both species are dependent on each other. The observed interaction type at the end of the  
171 simulation run (i.e., when both species reach minimal genomes) was used to label each evolutionary  
172 trajectory (Fig 2A). Notably, in some cases, one of the two species can go through a catastrophic drop of  
173 fitness (>50%) even in co-culture (e.g., due to a change in the *other* species' behavior that limits the  
174 availability of a metabolite it requires). In such cases, that species was considered to have gone extinct

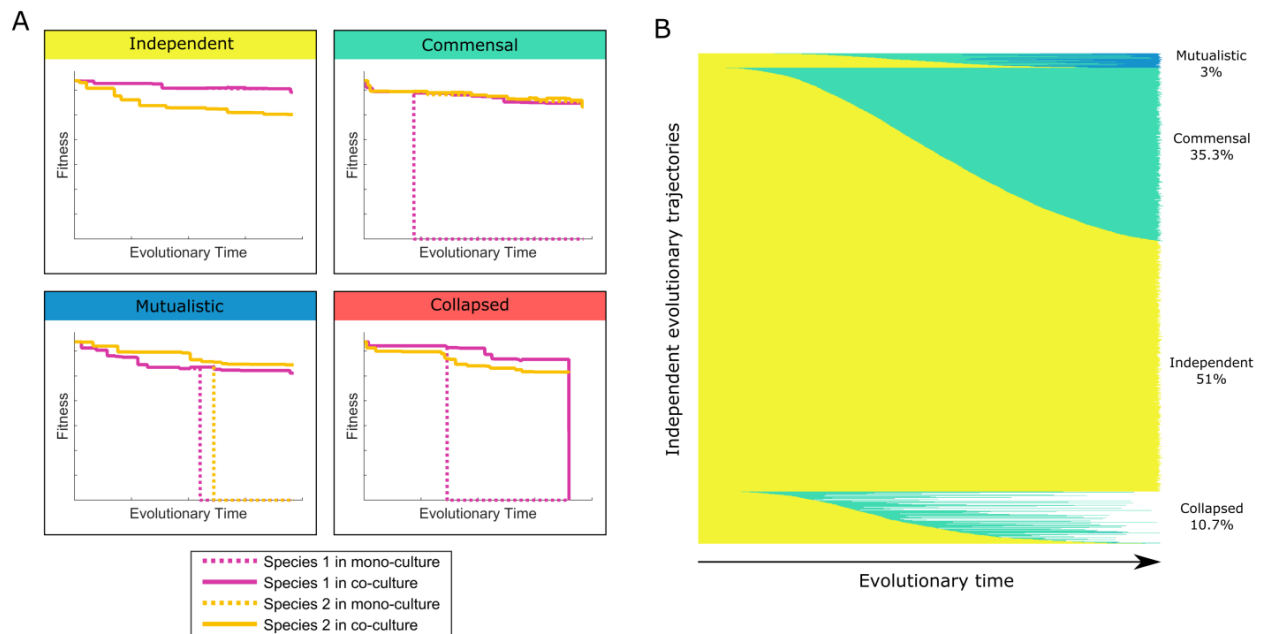

**Figure 2: Types of interactions and their emergence over time.** (A) Evolutionary simulations could result in one of four unique outcomes, determined by the ability of evolved species to grow in mono-culture and co-culture. Plotted are examples of each of these four outcomes, illustrating the fitness of each of the two species in mono-culture and in co-culture over evolutionary time. (B) The changes in interaction type over time for all 16,317 simulation runs. Each horizontal bar represents a single simulation run, and the color corresponds to the interaction type using the same colors as the titles in panel A.

175 and the simulation was labeled as a collapsed community. A detailed description of the framework is  
176 provided in Methods.

## 177 **The emergence and prevalence of species interaction**

178 We used the framework described above to simulate the evolution of a simple community  
179 comprising two species that go through a reductive evolution process. We assumed that the community  
180 composition is fixed as a two genotype community (i.e., with no new species migrating into the  
181 community and no standing genetic diversity). In the simulation below, we initialized the community  
182 with two identical *E. coli* strains (as a generalist model species). Such a scenario may represent the  
183 evolutionary trajectory of two obligate symbionts that may have diverged from a common ancestor.

184 We simulated 16,317 independent evolutionary trajectories (Methods) and for each simulation  
185 examined the evolved two-species community and the interaction between the two evolved species  
186 (Fig 2A). Surprisingly, although our framework does not impose an explicit pressure toward species  
187 interaction, we found that a substantial fraction of simulations resulted in a community with some sort of  
188 metabolic dependency between the two species. Specifically, 35% of the simulations ended with a  
189 commensal community, and 3.2% of the simulations ended with a mutualistic community (Fig 2B). In  
190 10.7% of the simulation, the community collapsed as described above. The remaining 51.1% of  
191 simulations ended with independent communities in which both species were still capable of independent  
192 growth. Using different fitness cutoffs for allowing deleterious gene deletions to fix affected the ratio of  
193 the different interaction types, with a more stringent cutoff resulting in more independent communities  
194 and a less stringent cutoff resulting in more commensal and mutualistic communities (see Supporting  
195 Text). In natural communities the strength of selection against deleterious gene deletion reflects multiple  
196 factors, ranging from population size to environment stability, which therefore indirectly affects the  
197 likelihood of emergent cooperation.

## 198 **An example of an emergent cross-feeding interaction**

199           Next, we set out to examine the specific genes and metabolic processes involved in emergent  
200 interactions. Before exploring large-scale patterns concerning the mechanisms involved in species  
201 interaction, we set out to characterize in detail one evolved community as an example of the kind of  
202 metabolic interaction that could emerge and the gene deletions that underlie such an interaction. We  
203 specifically focused on one simulation run where the two evolved species (arbitrarily referred to below as  
204 species A and species B) exhibited a mutualistic interaction. In this simulation, species A had retained  
205 only 306 genes and species B had retained only 304 genes (compared to 1260 genes in the ancestor  
206 species) and neither could grow in mono-culture. The two species, however, could still grow in co-culture  
207 (albeit at only 78% and 73% of the ancestor's growth rate, respectively).

208           To identify metabolites that may be involved in cross-feeding, we first detected all the  
209 metabolites found in the medium when the two evolved species grew in co-culture and that were not  
210 included in the initial growth medium. We then tried growing each of the two evolved species in mono-  
211 culture by augmenting the initial minimal growth medium with one or more of these candidate cross-  
212 feeding metabolites. We found that species A could grow on the initial medium once tyrosine was added  
213 (at 78% of the ancestor's growth rate). Species B could similarly grow on the initial medium once  
214 thymidine was added (at 72% of the ancestor's growth rate).

215           We further examined the fluxes through the metabolic models of the evolved species and  
216 compared them to the fluxes observed in the ancestor species, to identify the specific gene deletions that  
217 gave rise to these dependencies (Fig 3). We found that species A became dependent on external tyrosine  
218 due to a loss of the gene *tyrA*, which is necessary for tyrosine synthesis [39]. Indeed, species A's loss of  
219 *tyrA* occurred at the exact same point in the evolutionary trajectory as its loss of the ability to grow in  
220 mono-culture. Similarly, Species B became dependent on external thymidine due to a loss of the gene  
221 *thyA*, which is necessary for dTMP synthesis [40]. Notably, we were also able to identify the evolved  
222 mechanisms that allowed each of the two species to excrete the metabolite necessary for growth of the

223 other species. Specifically, species A started excreting thymidine due to a loss of the gene *cmk*, which is  
 224 necessary to phosphorylate CMP to CDP [41]. The loss of several other reactions prevented species A  
 225 from converting CMP to cytosine, uridine, uridine monophosphate, excreted uracil, or thymine, which  
 226 resulted in species A only being able to eliminate excess CMP by converting it to thymidine and excreting  
 227 it. Indeed, a *cmk* deletion in *E. coli* has been shown experimentally to result in 30-fold elevated CMP and  
 228 dCMP pools relative to wild-type [41]. Species B similarly excreted tyrosine due to an overproduction of  
 229 this metabolite following a complex combination of gene losses that resulted in elevated activation of the  
 230 pentose phosphate pathway and converting excess erythrose-4-phosphate into tyrosine. This community  
 231 provides examples of specific mechanisms that drive one species to support another via cross-feeding,  
 232 and those that are involved in the second species becoming dependent on these cross-fed metabolites. We  
 233 will next examine the prevalence of these and other specific metabolic interactions.

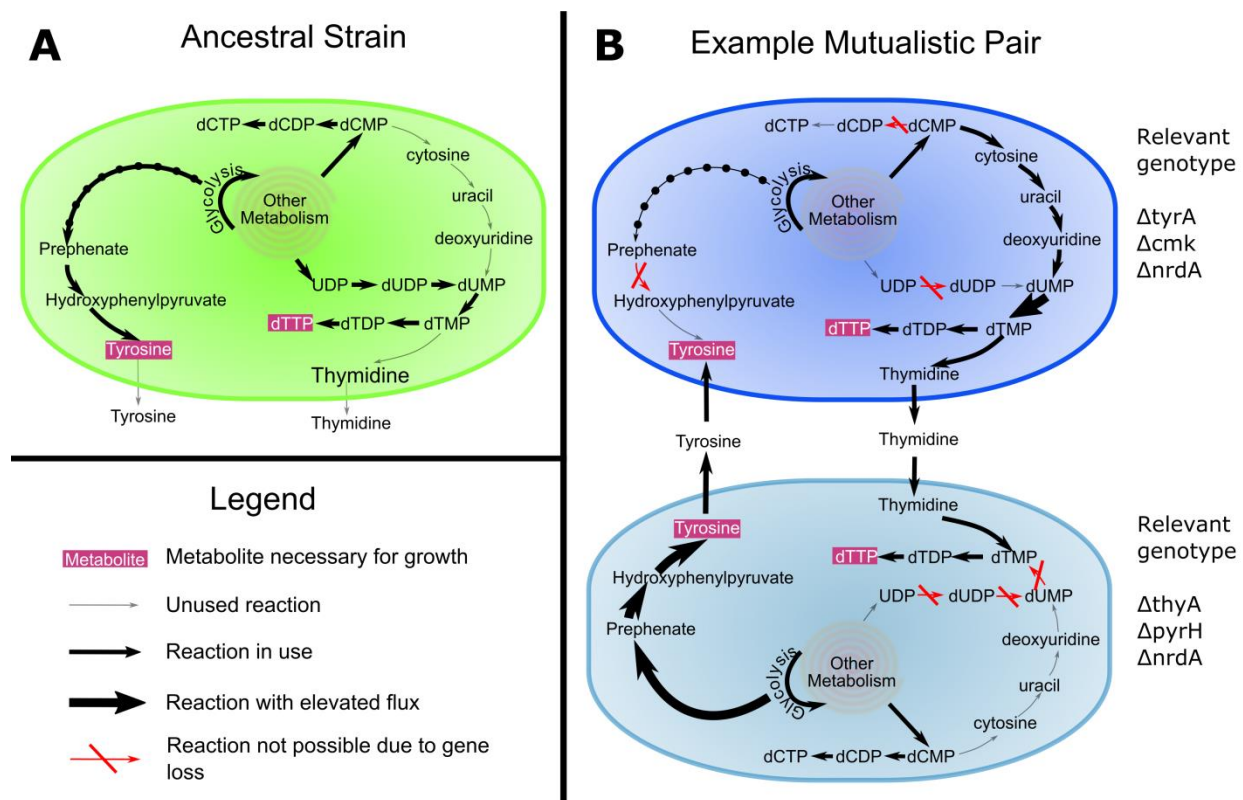

**Figure 3: Example of an evolved mutualistic community.** (A) In the ancestral species tyrosine is produced through the shikimate pathway and dTTP is produced from UDP. (B) In this example evolved mutualistic community, deletions in both species have led to obligate cross-feeding of tyrosine and thymidine. The relevant gene deletions and their impact on metabolic fluxes in each species are highlighted.

## 234 **Metabolite cross-feeding in evolved pairs**

235           After characterizing one cooperating pair in detail, we moved on to examine the complete set of  
236 communities evolved by our model, focusing specifically on identifying the metabolites underlying  
237 emergent species interactions. To infer such cross-fed metabolites, we simulated the growth of each  
238 evolved dependent species on minimal media supplemented with various metabolites and determined the  
239 minimal set of supplemented metabolites required for growth (as described above; see Methods). This set  
240 was assumed to represent essential metabolites provided by the partner.

241           We found that the majority of dependent species (94.3%) required only a single essential  
242 metabolite to be cross fed from their partner, with only a small fraction of dependent species requiring  
243 two or three such metabolites (5.5% and 0.2% respectively), and no species requiring more than three.  
244 Formate was the most common essential metabolite (65% in commensal dependent species; see Fig 4A),  
245 followed by Tyrosine (17.6%) and Phenylalanine (6.4%). Notably, the dependence on a single (or very  
246 few) metabolites reported above contrasts observations made in several insect symbionts systems where  
247 cooperating symbionts exchange multiple essential compounds (and see Discussion below), yet the  
248 exchange of aromatic amino-acids is in agreement with cross-fed metabolites often observed in such  
249 systems [13,42].

250           Complete dependence on cross-fed metabolites (such as those identified above) is the most  
251 defining feature of species interactions in these communities, but may represent an extreme form of  
252 interaction. Clearly, cross-feeding can be beneficial to a species even when it is not essential for growth,  
253 and in fact this form of cross-feeding may be a common precursor state of complete dependence. To  
254 detect such non-essential cross-fed metabolites we examined transporter fluxes and identified metabolites  
255 that are being excreted by one species in the community and uptaken by the other (Fig 4A, yellow  
256 circles). Indeed, in addition to the essential metabolites identified above, our analysis revealed multiple  
257 metabolites that are being cross-fed but are non-essential to growth. Such non-essential cross-feeding  
258 often involved metabolites that were rarely if ever depended on (such as acetaldehyde and pyruvate) and

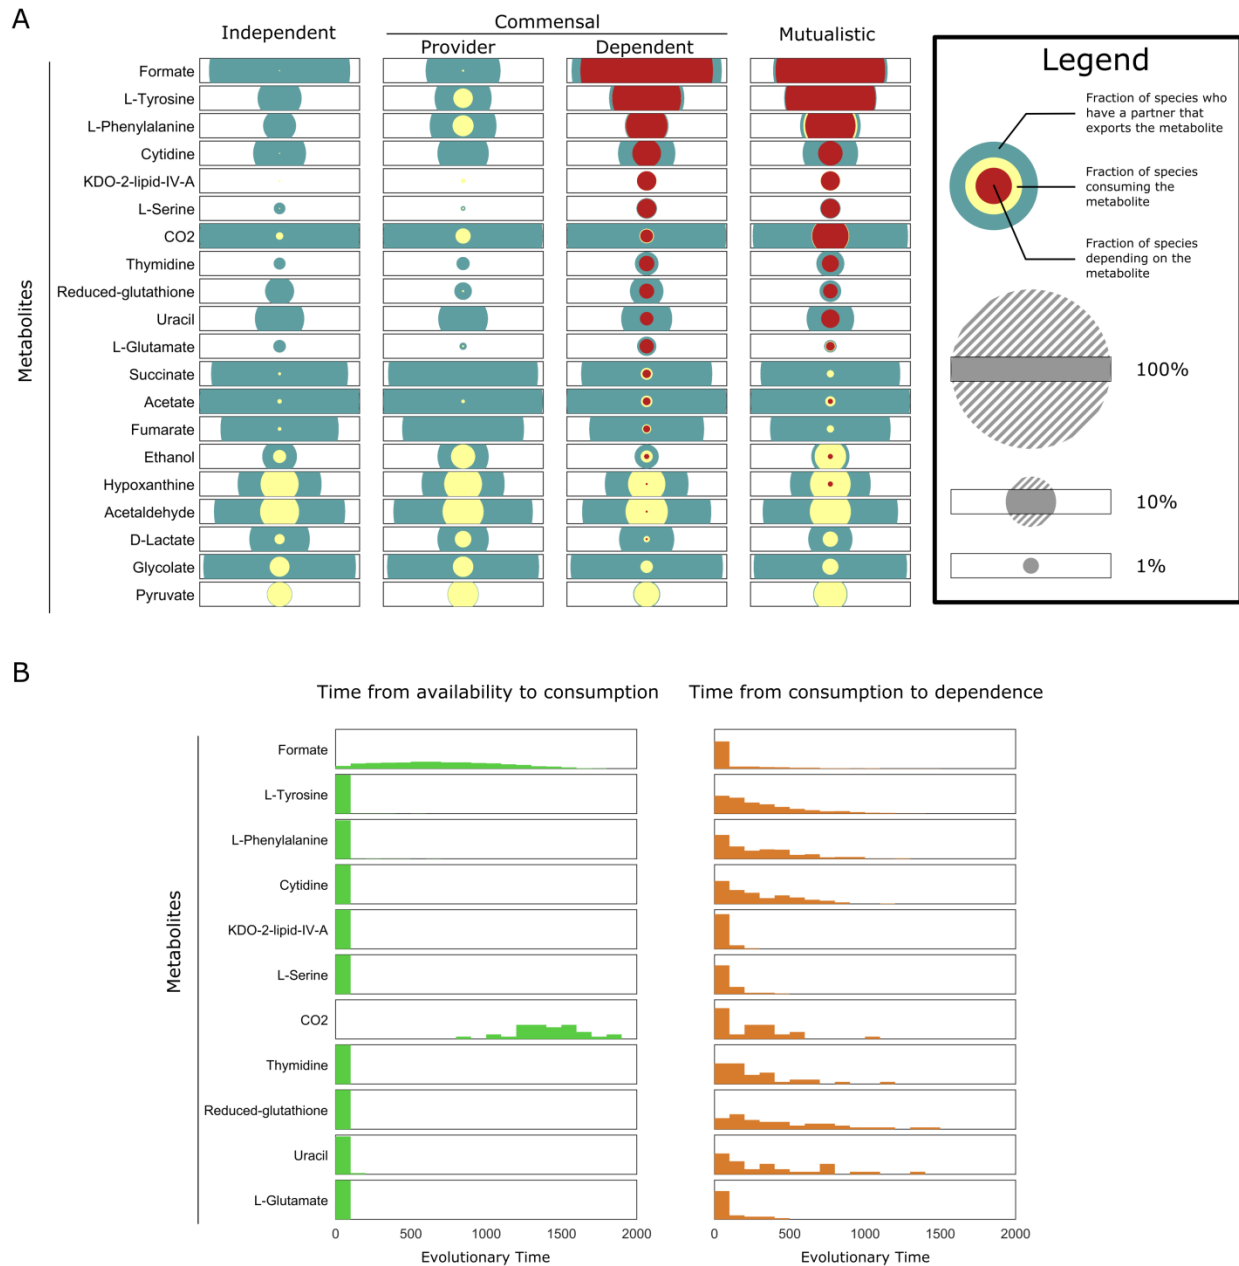

**Figure 4: Frequencies of metabolites' availability, cross-feeding, and dependence and the timing of their emergence. (A)** The frequencies of metabolites' availability, cross-feeding, and dependence are shown for species of each interaction type and for each metabolite. Each set of nested circles shows the frequency at which the given metabolite is produced by their partner species and hence available for uptake (blue), the frequency at which this metabolite is utilized by the species through cross-feeding (yellow), and the frequency at which this metabolites is depended on (red). The area of the circle scales with the frequency, but for visualization purposes the portions of the circle extending beyond the rectangular box are not shown. **(B)** The distributions of evolutionary time (measured as number of gene deletions) elapsed between the different stages of metabolic interaction, for commensal species dependent on a single metabolite.

259 were observed at similar frequencies in species across all interaction types. Interestingly, however, we  
260 also detected non-essential cross-feeding of metabolites that were commonly depended upon, but these  
261 were rare in independent communities and occurred surprisingly often in commensal communities where  
262 *providers* were cross-fed such metabolites by the dependent partner (see for example, tyrosine and  
263 phenylalanine in Fig 4A). This finding suggests that species cooperation may involve two species that  
264 evolve a similar metabolic strategy (and therefore have the potential to both excrete and utilize a similar  
265 set of metabolites). In such cases, cross-feeding is likely to emerge, first as a non-essential process, which  
266 may later evolve into species commensal or mutual dependence. To confirm this hypothesis, we  
267 specifically examined, for each dependent species, the time that elapsed from when this species started  
268 consuming a metabolite via cross-feeding to when it became dependent on that metabolite. We find that  
269 indeed, in most cases dependence does not immediately follow cross-feeding, and there is often a  
270 substantial delay between cross-feeding and dependency (Fig 4B).

271       Clearly, uptaking a metabolite is only possible if the partner species is producing that metabolite  
272 and excreting it to the shared environment, thereby providing an opportunity for cross-feeding. We  
273 additionally quantified the frequency and time at which such opportunities arose, regardless of whether  
274 the metabolite was consumed or not (Fig 4A, blue circles). We found that metabolites vary greatly in the  
275 frequency at which they are excreted, and in a way that is not fully correlated with the frequency at which  
276 they are cross-fed or dependent on. For example, various metabolites, including cytidine, succinate, and  
277 acetate, are excreted at relatively similar frequencies in all interaction types, suggesting that dependency  
278 on these metabolites is not limited by their availability. Conversely, other metabolites, such as serine and  
279 thymidine are rarely excreted in independent communities, suggesting that the availability of these  
280 metabolites often lead to cross-feeding and dependency on them. Most importantly, while cross feeding  
281 often started almost immediately after the metabolite was available (in cases in which it occurred; see  
282 Fig 4B), in many cases evolving species failed to utilize available metabolites, thus completely missing  
283 cross-feeding (both essential and non-essential) opportunities (Fig 4A). This finding implies an intriguing

284 dichotomy where available opportunities are either utilized immediately or are not utilized at all,  
285 potentially due to evolutionary constraints.

286 We finally examined the total number of different metabolites being excreted by each species  
287 over time, hypothesizing that species that excrete useful metabolites early on are more likely to become  
288 provider species. Surprisingly, however, we found that during the first half of the evolutionary process  
289 future providers in fact tend to excrete a similar or even a smaller number of metabolites on average  
290 compared to future dependents (Fig S1), and only toward the end of the evolutionary process did  
291 providers excrete more metabolites than dependent species. This pattern could suggest that species that  
292 eventually became dependent were less optimal early on, excreting more waste products, and that this  
293 wasteful behavior may have led to the development of dependence. Notably, all species gradually excrete  
294 more metabolites over the course of the evolution process, likely reflecting more complex growth  
295 strategies imposed by their shrinking genome).

## 296 **The genomic basis of evolved interactions**

297 Our mechanistic model of microbial metabolism allows us to move beyond a phenotype-level  
298 description of evolved communities and to directly investigate patterns of genome evolution and identify  
299 genomic mechanisms involved in species interactions. We first examined the number of genes that were  
300 retained or lost in different simulations to explore the relationship between genome size (in terms of the  
301 number of genes retained) and species interaction. Surprisingly, with the exception of collapsed  
302 communities, evolutionary trajectories exhibited a markedly low variation in the total number of genes  
303 retained (note, for example, the similar length of the simulation runs illustrated in Fig 2B), with an  
304 average of  $298.6 \pm 4.4$  genes retained in each species. Yet, when comparing species from communities of  
305 different interaction types, we found that both dependent and mutualistic species had slightly but  
306 significantly smaller genomes compared to independent species ( $P < 10^{-30}$  and  $P < 10^{-9}$  respectively; two  
307 sample t-test; Fig 5A). Moreover, within commensal communities, the genomes of dependent species  
308 were slightly but significantly smaller than the genomes of provider species ( $P < 10^{-30}$ ). Notably, while



309 these differences in *average* genome size were generally very small (often less than a single gene), the  
310 differences between the *smallest* genomes observed in the dependent or mutualistic species and the

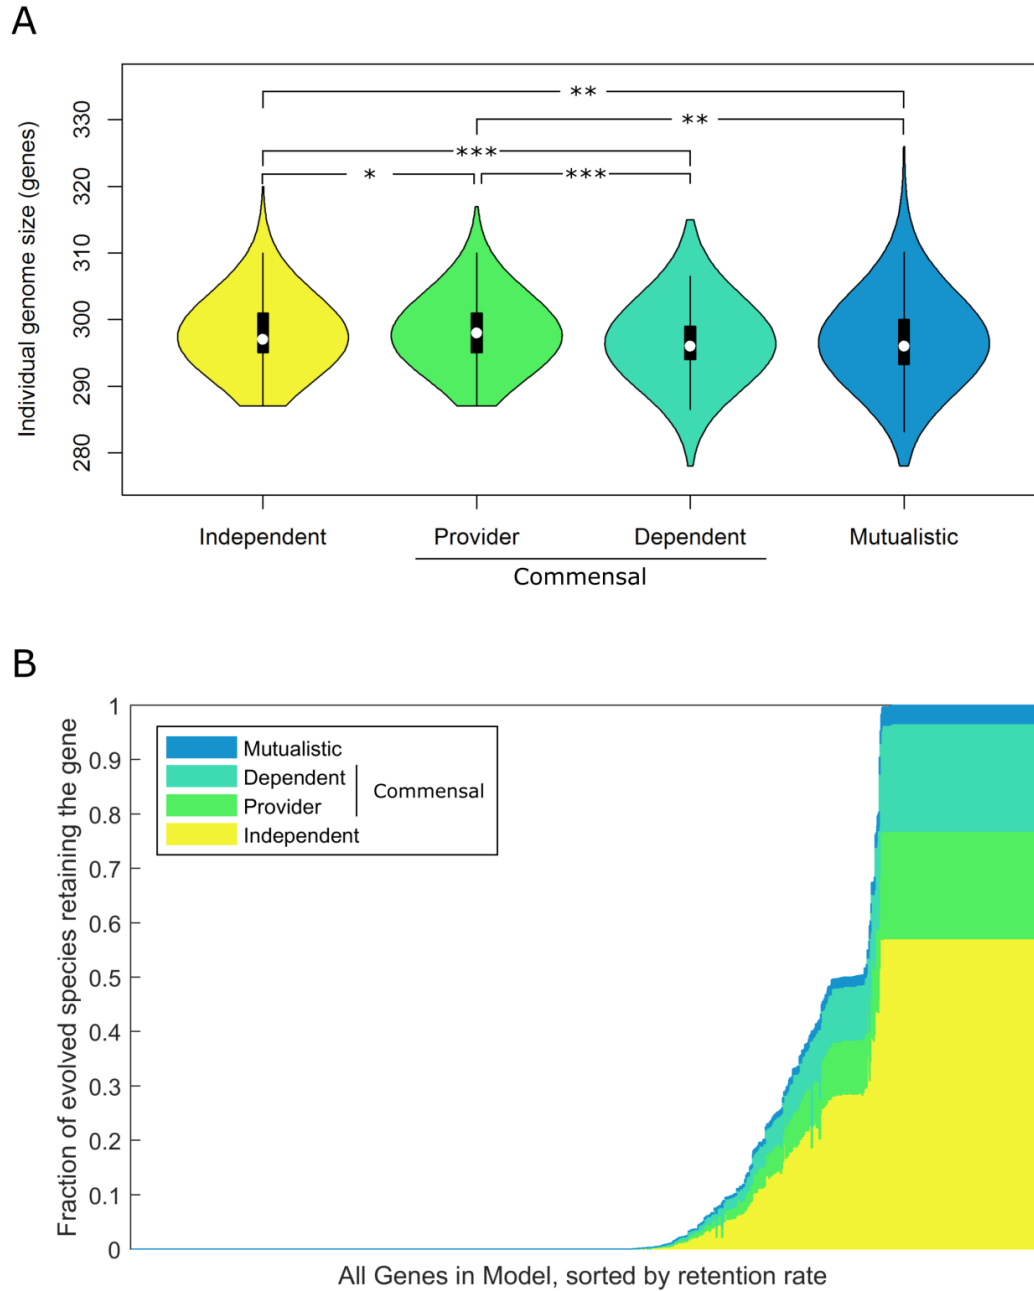

**Figure 5: Genome size and gene retention frequency in evolved genomes.** (A) Distributions of the genome size of evolved species from each interaction type. (\*:  $P < 10^{-3}$ ; \*\*:  $P < 10^{-9}$ ; \*\*\*:  $P < 10^{-30}$ ) (B) The distribution of retention rates of different genes in the model. Each gene is plotted as a vertical bar with height equal to the fraction of species in non-collapsed simulations that retained it. Each bar is colored by the fraction of species retaining that gene that are in each of the different interaction types.

311 smallest genomes observed in provider or independent species was much larger (278-287 genes; Fig 5A).  
312 These results are consistent with the idea that cross-feeding allows dependent species to lose genes they  
313 would not be able to lose otherwise [14,43]. Moreover, provider species had on average a slightly larger  
314 genomes than independent species ( $P < 10^{-3}$ ), suggesting that provider species are a potential consequence  
315 of evolutionary trajectories that ended with larger minimal genomes. Notably, examining the genes  
316 retained across the evolved species, we found that of the initial 1260 genes present in the ancestral  
317 species, 560 were always lost and 149 were always retained, with only 551 genes being retained at  
318 intermediate frequencies (Fig 5B). The specific subset of these 551 genes that were retained in each  
319 evolved species therefore determines the types of interaction that emerged, and indeed a statistical  
320 analysis was able to detect specific genes whose retention or loss was associated with specific types of  
321 interaction (see Supporting Text).

322 We next examined how similar, on average, are the sets of genes retained between the two  
323 partners in each community. We found that mutualistic species were less similar to each other than  
324 independent species ( $P < 10^{-20}$ ; two sample t-test). This finding suggests that the evolution of metabolic  
325 dependency is associated with a process of functional diversification, where each of the two species  
326 retains certain metabolic capacities that the other species has lost. To further investigate this  
327 diversification process we turned our attention again to commensal communities, in which the two  
328 species can be labeled clearly as dependent and provider and therefore the direction of dependency is  
329 clear. Such communities also represent an intermediate level of interaction as compared to mutualistic  
330 communities, in which each species is acting as both provider and dependent, which complicates  
331 dissection of the mechanism of interaction. Indeed, the two partner species in commensal communities  
332 were more similar to one another than species in mutualistic communities ( $P = 1.4 \times 10^{-7}$ ) but more  
333 divergent than species in independent communities ( $P < 10^{-20}$ ).

334 To better understand the diversification between providers and dependent species in commensal  
335 communities, we compared the set of genes retained in providers vs. those retained in dependent,

336 identifying 80 genes that are more frequently retained in the provider and 41 that are more frequently  
337 retained in the dependent species. For example, *pflA*, a pyruvate formate lyase, was retained in 55.5% of  
338 providers but only 16.8% of dependents, whereas *aceE* and *aceF*, both components of the pyruvate  
339 dehydrogenase complex, were retained in 81.1% in dependent species and only 19.0% in provider species  
340 (these genes were also those with the greatest differential retention rate). This previous analysis identified  
341 genes more often retained in the provider or dependent species, yet ignored information about which of  
342 these retentions co-occurred in the same provider-dependent community. Applying a hypergeometric test  
343 (see Methods), we therefore identified a set of 263 pairs of genes that are significantly exclusively-  
344 retained in commensal communities (i.e., the dependent species retained the first gene when the provider  
345 lost the second gene or vice-versa more often than expected by chance; Fig S2). We further found that  
346 this set of exclusively-retained gene pairs was enriched for pairs that shared a pathway annotation ( $P <$   
347  $10^{-4}$ ; permutation-based test), suggesting complementation at the pathway level.

348 We finally set out to examine the dynamics of gene deletion events in commensal communities,  
349 specifically focusing on the *order* in which deletions occurred in the provider and dependent species and  
350 aiming to detect dependencies between these deletion events that could highlight key evolutionary steps  
351 on the route to cross-feeding. To this end, we used a permutation-based analysis to identify instances  
352 where a gene in one species tended to be deleted after another gene was deleted in the partner species (see  
353 Methods). We identified 9 such gene pairs (at 1% FDR), all of which involved a gene being deleted in the  
354 dependent species significantly more often after a different gene was first deleted in the provider.  
355 Specifically, deletion of the *tyrA* gene in the dependent often followed deletion of a set of genes (*talA*,  
356 *talB*, *aroP*, and *pheP*) in the provider. *talA* and *talB* catalyze a reaction connecting glycolysis to the  
357 pentose phosphate pathway, and their deletion likely disrupts central carbon metabolism and diverts  
358 excess flux toward aromatic amino acid biosynthesis. Similarly, *aroP* and *pheP* are both transporters  
359 capable of transporting phenylalanine, and their deletion potentially prompts the excretion of tyrosine  
360 instead of phenylalanine. These deletions therefore promote over production and excretion of tyrosine by

361 the provider, allowing the dependent to lose *tyrA*, a gene necessary for tyrosine synthesis. The deletion of  
362 the *pheA*, a gene necessary for phenylalanine synthesis in the dependent, was also found to follow the  
363 deletion of *talA* and *talB* in the provider, which is not surprising given the similarity in the biosynthesis  
364 pathways of these two amino acids. Finally the deletion of *pyrG* in the dependent tended to follow the  
365 deletion of *cdd*, *cmk*, and *codA* in the provider. The deletion of *cmk* (necessary for recycling CMP into  
366 CTP) and of *cdd* and *codA* (catalyzing reactions that could convert CMP or related products into other  
367 bases) could result in cytidine excretion and accordingly allows the dependent to lose *pyrG* (a component  
368 of CTP synthase) which creates a dependency on cytidine (Fig S3). To further examine the mechanism  
369 involved in these interactions, we tested whether the deletions of these key genes are sufficient to cause  
370 over-production and excretion of the relevant metabolites. Indeed, we found that deletion of *cdd*, *cmk*, and  
371 *codA* in the ancestral species (i.e., without any additional gene deletions) led to cytidine excretion.  
372 Deletion of *talA*, *talB*, *aroP*, and *pheP* in the ancestral species, however, was insufficient to cause  
373 excretion of either phenylalanine or tyrosine, suggesting that additional gene deletions are necessary to  
374 give rise to this phenotype.

### 375 **Linking genome evolution to metabolite cross-feeding**

376 Having identified both the metabolites involved in cross-feeding and the genes involved in the  
377 emergence of species interaction, we finally turned to examine the association between specific gene  
378 retention or loss events and the cross-feeding of specific metabolites. Towards this end we again  
379 considered the set of all commensal communities and, for each of the 14 cross-fed metabolites that were  
380 depended upon at least 10 times, identified genes whose retention or deletion are significantly correlated  
381 with the excretion of this metabolite in the provider or with the dependency on this metabolite in the  
382 dependent (see methods). In total we identified 384 gene-metabolite associations in provider species,  
383 including 226 significant gene retentions and 158 significant gene deletions associated with essential  
384 metabolite excretion (Fig 6;  $\chi^2$  test, 1% FDR). We similarly identified 459 gene-metabolite associations in  
385 dependent species (277 retentions and 182 deletions) associated with metabolite dependency. In total,



396 example *serA* and *serB* – genes involved in serine biosynthesis – tended to be lost in species dependent on  
397 serine, but retained in species producing it. In rare cases there were genes whose loss was associated with  
398 both dependence and providing of a specific metabolite. For example, the loss of the gene *codA* was  
399 associated with both excretion of cytidine by providers and dependency on cytidine in dependent species  
400 (and see our analysis of that gene above). Combined, these associations suggest a complex link between  
401 evolutionary gene loss events and the emergence of metabolic species interactions and highlight the  
402 multitude of ways through which such interactions could evolve.

403

## 404 **Discussion**

405 In this study we investigated the potential for metabolic mutualism to emerge between species  
406 inhabiting a shared, isolated environment and undergoing continual gene loss. We found that cross-  
407 feeding interactions emerged frequently (although two-way mutualistic interactions were much rarer). By  
408 examining associations between the loss and retention of genes and cross-fed metabolites we were able to  
409 elucidate evolved mechanisms of metabolic overproduction and dependence and to identify the extent to  
410 which the genetic and metabolic architectures imposed constraints on this process.

411 Importantly, evolved communities exhibited complex, multifaceted, and non-trivial metabolic  
412 interactions that were not necessarily optimized at the community level; useful metabolites were often  
413 excreted by one species but not utilized by its partner and other metabolites were cross fed without  
414 evolving complete dependency. Such “messy” interactions and missed metabolic opportunities are a  
415 reasonable outcome of selfish species evolution in the absence of explicit selection for interaction, and  
416 could also occur in natural communities. Another potential contributor to this complexity is the  
417 interconnectedness of different metabolic phenotypes induced by the genetic and metabolic architecture.  
418 Indeed, our analysis has demonstrated that genes were often associated with the excretion and/or  
419 production of multiple different metabolites. This interconnectedness may also account for the relatively  
420 frequent occurrence of provider species utilizing metabolites excreted by their dependent partners, where

421 the gene retention and loss events that cause a dependent relationship in one direction may also facilitate  
422 emergence of a reciprocal cross-feeding relationship. Interestingly, however, in our simulations,  
423 metabolic *dependency* usually involved a single metabolite, while real world mutualistic endosymbionts  
424 often exchange and are dependent on multiple metabolites [13]. One potential explanation is that in our  
425 model bacteria continue to grow optimally (given the metabolic capacities encoded by their reduced  
426 genome), whereas in reality extreme genome reduction likely impacts cell regulation and control of  
427 growth, potentially causing cells to excrete a larger variety of useful metabolites that could be beneficial  
428 to their partners. Our analysis also suggests that the likelihood of missed metabolic opportunities may  
429 vary across metabolites, with some metabolites (e.g., cytidine, succinate, and acetate) being excreted as  
430 relatively similar frequencies in all interaction types and others (e.g., serine and thymidine) being rarely  
431 excreted in independent communities.

432 Our analysis additionally demonstrated how functional diversification leads to metabolic  
433 cooperation, where each species retains certain metabolic capacities that the other species has lost. Given  
434 a diversification process, it is interesting, however, to speculate about what causes one community to  
435 evolve a commensal interaction and another to evolve a mutualistic interaction. We found, for example,  
436 that provider species had on average a slightly larger genome than independent species, suggesting that a  
437 provider state is the outcome of more constrained evolutionary trajectories that end with larger minimal  
438 genomes. Our finding that dependent species in fact tend to excrete more metabolites at the beginning of  
439 the evolutionary process might further imply that early ‘wasteful’ behavior may contribute to the  
440 evolution of dependence. Another interesting outcome of our results was the dichotomy observed when a  
441 new metabolite became available, with species either starting to consume it immediately and later  
442 becoming dependent on it or never consuming it at all. These missed opportunities seem to be examples  
443 where the evolutionary events that occurred before the availability of the metabolite precluded utilization  
444 of that metabolite by potentially losing the necessary transporter or other reactions necessary for uptake.  
445 With this in mind, the non-essential cross feeding observed in commensal communities may simply

446 represent communities that were on the path toward mutualism, but where cross-feeding emerged too late  
447 in the evolutionary process when the providers have already lost genes that would be necessary for  
448 dependence.

449         Despite these exciting results, there are clearly some caveats in the framework used in this work.  
450 For example, our framework assumes that bacteria grow selfishly, and accordingly cross-feeding often  
451 requires extensive gene deletions to force excretion of useful metabolites. In reality bacteria can be leaky  
452 and release metabolites into their environment even without mutations [17,24]. Another drawback stems  
453 from the fact that FBA does not take into account factors such as entropy or pH. For example, the  
454 emergence of formate cross-feeding that occurred in our simulations might be less biologically feasible  
455 because excess formate accumulation inhibits *E. coli* growth and acidifies the local environment [44].  
456 Additionally, we model genome reduction as occurring one gene at a time [45], but do not account for the  
457 possibility of simultaneous loss of larger genomic regions [46]. Such a process could give rise to different  
458 patterns, although a study of a single reductively evolving species that examined both evolutionary  
459 regimes did not observe qualitative differences [36]. Moreover, in consideration of simulation time, in  
460 this study we only considered two-genotype communities. It would be interesting to expand our  
461 framework and to model the evolution of more complex communities or to account for spatial  
462 heterogeneity [47,48]. Finally, two decisions in the design of our study that likely had significant impacts  
463 on the outcomes were the media and the fitness cutoff. The media used is M9 minimal media, which was  
464 chosen to be more permissive of cross-feeding than rich media. Clearly, choosing different media or  
465 different limiting concentrations could impact the type of interactions that would evolve [49]. The fitness  
466 cutoff used was chosen as an intermediate value between the two cutoffs used by [36], and as shown in  
467 the supplementary text was found to have a significant effect on the frequency of evolved commensalism  
468 and mutualism. Since this fitness cutoff represents the strength of selection, a permissive fitness cutoff (as  
469 the one used in our study) allows genetic drift to play a dominant role in determining evolutionary



470 trajectories, in agreement with the balance between selection and genetic drift hypothesize to govern the  
471 evolution of endosymbionts [26].

472         Looking forward, the framework presented in this study could be broadly relevant for improving  
473 our understanding of how mutualistic relationships can naturally emerge between bacterial species. This,  
474 in turn, would facilitate a deeper understanding of both simple communities, as in the case of insect  
475 endosymbionts, and significantly more complex communities, such as those inhabiting the human gut.  
476 Moreover, translationally, our approach could be useful to aid and inform the design of dependencies  
477 between bacterial species in order to increase the stability and reliability of synthetically constructed  
478 bacterial communities or interventions.

479

## 480 **Methods**

### 481 **Evolution Simulation**

482         The evolution simulation was initiated with a pair of genome scale metabolic models. For this  
483 study all simulations were initiated with two identical copies of the iAF1260 *E. coli* model [50]. This  
484 model includes 1260 genes, 2382 reactions, and 1668 metabolites (which includes extracellular,  
485 periplasmic, and cytoplasmic versions of some of the same metabolites). 304 of those metabolites can be  
486 exchanged with the external environment. During each step in the evolutionary process, a gene in one of  
487 the two species was chosen uniformly at random from the set of all genes still retained by the two species.  
488 The chosen gene and all the metabolic reactions that depend on this gene were deleted from the species'  
489 model. The fitness effect of this deletion in the context of the community was determined using the co-  
490 culture growth model (see below) to evaluate the growth rate of the reduced model when grown with the  
491 current model of the partner species. If the calculated fitness effect (when compared to the fitness of that  
492 species prior to this gene deletion) was positive, neutral, or smaller than the chosen cutoff (cutoffs used  
493 include 1%, 5%, and 10%), the deletion became permanent and the process repeated with the reduced  
494 model. However, if the fitness effect exceeded the cutoff, the deletion was considered to be too harmful to

495 occur and the process repeated until a gene that could be deleted was found. This evolutionary process  
496 continued until deletion of any remaining gene from either of the two species would cause a drop in  
497 fitness exceeding the cutoff, in which case the simulation ended. The simulation also ended if the chosen  
498 gene deletion in one species (i.e., a gene deletion that was relatively harmless for that species) caused the  
499 other species to drop significantly in fitness (>50%) in the co-culture. Such simulations, where a partner  
500 species was no longer being supported, represent collapsed communities.

### 501 **Co-Culture Growth Simulation**

502 The co-culture growth simulation was based on a previously introduced dynamic Flux-Balance  
503 Analysis framework and is described in more detail elsewhere [37]. Briefly, given a multi-species  
504 community inhabiting a shared medium, the framework assumed that at each time step, each species grew  
505 optimally given the current concentration of metabolites in the medium (i.e., selfish growth), and then  
506 updated the abundance of each species and the concentration of metabolites in the medium based on the  
507 predicted growth and activity of each species. Specifically, at each time step, the framework first  
508 calculated the upper bound on metabolites' uptake for each species based on the concentration of  
509 metabolites in the medium and the cell density of each species. A Flux Balance Analysis (FBA) was then  
510 used to determine the fluxes through each species' reactions given these uptake constraints by  
511 maximizing the species' biomass production (as a proxy for growth). A second optimization was  
512 performed to minimize the total flux through all reactions while keeping the biomass production fixed at  
513 the maximum rate (representing a minimization of enzyme usage). The predicted growth rate of each  
514 species and the predicted rates at which each species uptakes and excretes various metabolites were then  
515 used to update the cell density and concentrations of metabolites in the medium. The process was then  
516 repeated at the next time step.

517 For the purpose of this study, each co-culture simulation consisted of 8 steps of 0.125 hours  
518 followed by 4 steps of 0.5 hours. This provided a more accurate account of species growth at the initiation  
519 of any potential interaction, while still providing information about the co-culture growth at a longer time

520 scale. The growth rates at the last time point (i.e., after 2.5 hours) were used as a measure of each species’  
521 fitness. Both species started at a biomass of 0.01 grams dry mass in 1L volume for mono-culture or 2L for  
522 co-culture, resulting in the same cell density for both (which is equal to about  $4 \times 10^7$  cells per liter for *E.*  
523 *coli*). The species were grown on a medium based on M9 minimal media [51], containing sodium,  
524 chloride, sulfate, inorganic phosphate, potassium, magnesium, ammonia, glucose, water, hydrogen, and  
525 oxygen. In addition the metals copper, iron, molybdate, manganese, zinc, nickel, and cobalt were included  
526 as they are necessary for growth of the *E. coli* model. These metabolites were all present in the medium at  
527 an excess concentration of 10M to ensure exponential growth for the entire course of the co-culture  
528 simulation. A low concentration (0.0001 mM) of jumpstart metabolites were also included to allow  
529 growth of obligate mutualistic pairs (see below). FBA solutions were calculated using glpk mex, a Matlab  
530 interface for GLPK, GNU Linear Programming Kit. GLPK version 4.54 was used, and glpk mex version  
531 2.11.

## 532 **Jumpstarting Mutualistic Growth**

533 Simulating the growth of species that evolved to be obligate mutualists with a dynamic FBA  
534 model has the inherent problem that neither species is able to grow initially on the minimal medium (and  
535 consequently will not excrete any of the byproducts needed to allow the other species to grow). In  
536 biological systems this problem can be overcome by heterogeneity in the growth phenotypes of individual  
537 cells, nutrients released by dead cells, or trace nutrients present in the environment. Rather than  
538 simulating diverse growth phenotypes or cell death, in this study we jumpstarted mutualistic growth by  
539 supplementing the minimal growth medium described above with trace amounts of potentially necessary  
540 metabolites. The set of these “jumpstart metabolites” was determined by identifying metabolites that  
541 could be produced by non-transfer reactions still present in at least one of the two species (even if the  
542 pathway was not complete). This set therefore represented an upper bound on which metabolites could be  
543 exchanged. Jumpstart metabolites were initialized at a low concentration of 0.0001 mM. To ensure that  
544 species that utilized these metabolites for growth could eventually be supported by the production of these

545 metabolites by the partner species (rather than continually relying on the trace amounts of these  
546 metabolite provided at the beginning of the simulation), at 1 hour into the growth simulation, this same  
547 low concentration (0.0001 mM) was subtracted from each jumpstart metabolite.

## 548 **Filtering Completed Simulation Runs**

549 Simulation runtime considerations necessitated using a relatively limited time resolution in the  
550 co-culture growth simulation (see above). To confirm that the evolved communities were not affected by  
551 this, for each completed simulation we ran additional co-culture growth simulations on the resulting  
552 minimal models using a finer time resolution. Specifically, co-culture growth was simulated until the  
553 medium was exhausted with time steps of 0.1 hours, using otherwise the same conditions as the co-  
554 culture growth model employed during evolution (including removing the jumpstart metabolites at 1  
555 hour). Community growth was deemed to have been accurately simulated if:

- 556 1. Glucose eventually ran out, indicating that the two species were able to continue growing stably.
- 557 2. Both species were able to continue growth until this exhaustion of the media. Growth of both species  
558 must have been at least 50% of their measured fitness value within the last hour before all growth  
559 ended.
- 560 3. The growth rate of both species at  $2.5 \pm 0.2$  hours was at least 90% of their fitness value as measured  
561 during the course of the evolution.

562 Simulations that failed any of these three criteria were excluded from the downstream analysis. Of the  
563 16377 completed simulation runs, 16, 317 (99.6%) passed this filtering step.

## 564 **Determining Interaction Type**

565 Interaction type was determined by comparing the fitness of each species when grown in co-  
566 culture with its fitness when grown in mono-culture. If the fitness of a species at a given time point was  
567 zero in mono-culture and non-zero in co-culture, the species was labeled as dependent at that time. If it  
568 had non-zero growth in both mono- and co-culture it was labeled as independent. Communities were  
569 labeled by the relationships between the two species: If both species were independent, the community

570 was labeled as independent. If one species was dependent and the other was independent, the community  
571 was labeled as commensal. If both species in a community were dependent, the community was labeled as  
572 mutualistic. Within commensal communities, the dependent species was referred to as ‘dependent’ and  
573 the independent species was referred to as ‘provider’.

## 574 **Determining Metabolic Dependencies**

575 For each evolved species we determined what metabolites it depends on (if any). To this end, we  
576 first identified metabolites that were being exchanged between the two species at the final co-culture  
577 growth time point by finding exchange reactions for which the two species had fluxes of opposite sign.  
578 The growth of each dependent species in the pair was then assayed on minimal medium supplemented  
579 with all possible combinations of these exchanged metabolites, using a single time step mono-culture  
580 growth model, to identify the smallest set of supplement metabolites that allowed it to grow at >50% its  
581 growth rate in co-culture. If no combination of supplement metabolites allowed such growth the search  
582 was expanded to include all combinations of metabolites present in the medium at the end of the co-  
583 culture simulation and that were not part of the minimal media (such metabolites could have been  
584 excreted by the provider at previous time steps).

## 585 **Pathway Analyses**

586 Pathways annotations for each gene in the model were obtained from the Kyoto Encyclopedia of  
587 Genes and Genomes (KEGG) [52]. To identify enrichment of KEGG pathways in subsets of genes (e.g.,  
588 those that were deleted at significantly different rates between interaction types), we generated 100,000  
589 random subsets of genes of the same size and compared the total number of genes associated with each  
590 pathway in the real set to the number of genes associated with that pathway in random sets.

## 591 **Measuring Genome Similarity**

592 To compare the similarity of two genomes (e.g., in an evolved community), we used the Jaccard  
593 similarity coefficient. We then used a two-sample t-test to test for significant differences in similarity  
594 between different types of communities.

## 595 **Identifying Co-Retained Gene Pairs**

596 To identify gene-gene co-occurrence relationships, we examined all pairwise combinations of  
597 genes that were both retained and deleted at least three times. Since many genes perfectly co-varied with  
598 each other across simulations, we first grouped genes into sets of perfectly co-varying genes and  
599 identified co-occurrence relationships between these sets. For each pair of gene sets, we found the number  
600 of species that had retained each set and the number of species that had retained both sets and used a  
601 hypergeometric test to determine whether these sets have been co-retrained significantly more or less  
602 often than expected by chance (at 1% false discovery rate; [53]). Test for enrichment of shared pathways  
603 among the significant gene set pairs was done by permuting the connections between pairs.

## 604 **Identifying Significant Gene Deletion Ordering**

605 Given a pair of genes, A and B, we recorded the number of times gene A in the dependent was  
606 deleted before gene B in the provider. We then used a permutation-based assay, permuting the time of  
607 deletion (measured as the position in the ordering of all gene deletions in that simulation) of each gene  
608 between all providers or dependents from commensal communities in which that gene had been deleted.  
609 Gaps and overlaps in the resulting permuted gene deletion histories were resolved by shifting deletions  
610 into gaps and randomly breaking ties. The number of times gene A in the dependent was deleted before  
611 gene B in the provider in the original data was compared to this number in the permuted data to identify  
612 significantly common ordered pairs of gene deletes (at 1% false discovery rate).

## 613 **Gene-Metabolite Connections**

614 To identify correlations between retention or deletion of specific genes and metabolic  
615 phenotypes, we considered all genes that were both deleted and retained at least 10 times and all  
616 metabolites that were depended upon at least 10 times. For every pair of such genes and metabolites, we  
617 compared the frequency of deletion of that gene in commensal species that are dependent on that  
618 metabolite to the frequency of deletion of that gene in independent species. This was repeated for

619 commensal species that provided the metabolite their partner depends upon, and in both cases instances of  
620 genes being deleted more often or retained more often in species with that metabolic phenotype were  
621 identified (at 1% false discovery rate).

## 622 **References**

623

- 624 1. Wintermute EH, Silver PA. Dynamics in the mixed microbial concourse. *Genes Dev.* 2010;24:  
625 2603–14. doi:10.1101/gad.1985210  
626
- 627 2. Shong J, Jimenez Diaz MR, Collins CH. Towards synthetic microbial consortia for bioprocessing.  
628 *Curr Opin Biotechnol.* 2012;23: 798–802. doi:10.1016/j.copbio.2012.02.001  
629
- 630 3. Clemente JC, Ursell LK, Parfrey LW, Knight R. The Impact of the Gut Microbiota on Human  
631 Health: An Integrative View. *Cell.* 2012;148: 1258–1270. doi:10.1016/j.cell.2012.01.035  
632
- 633 4. Huttenhower C, Gevers D, Knight R, Abubucker S, Badger JH, Chinwalla AT, et al. Structure  
634 function and diversity of the healthy human microbiome. *Nature.* 2012;486: 207–214.  
635 doi:10.1038/nature11234  
636
- 637 5. Falkowski PG, Fenchel T, Delong EF. The Microbial Engines That Drive Earth’s Biogeochemical  
638 Cycles. *Science.* 2008;320: 1034–1039. doi:10.1126/science.1153213  
639
- 640 6. West SA, Diggle SP, Buckling A, Gardner A, Griffin AS. The Social Lives of Microbes. *Annu*  
641 *Rev Ecol Evol Syst.* 2007;38: 53–77. doi:10.1146/annurev.ecolsys.38.091206.095740  
642
- 643 7. Kaeberlein T, Lewis K, Epstein SS. Isolating “Uncultivable” Microorganisms in Pure Culture in a  
644 Simulated Natural Environment. *Science.* 2002;296: 1127–1129. doi:10.1126/science.1070633  
645
- 646 8. McInerney MJ, Struchtemeyer CG, Sieber J, Mouttaki H, Stams AJM, Schink B, et al. Physiology,  
647 Ecology, Phylogeny, and Genomics of Microorganisms Capable of Syntrophic Metabolism. *Ann*  
648 *N Y Acad Sci.* 2008;1125: 58–72. doi:10.1196/annals.1419.005  
649
- 650 9. Sieber JR, McInerney MJ, Gunsalus RP. Genomic Insights into Syntrophy: The Paradigm for  
651 Anaerobic Metabolic Cooperation. *Annu Rev Microbiol.* 2012;66: 429–452. doi:10.1146/annurev-  
652 micro-090110-102844  
653
- 654 10. Belenguer A, Duncan SH, Calder AG, Holtrop G, Louis P, Lobley GE, et al. Two routes of  
655 metabolic cross-feeding between *Bifidobacterium adolescentis* and butyrate-producing anaerobes  
656 from the human gut. *Appl Environ Microbiol.* 2006;72: 3593–9. doi:10.1128/AEM.72.5.3593-  
657 3599.2006  
658
- 659 11. Falony G, Vlachou A, Verbrugghe K, De Vuyst L. Cross-feeding between *Bifidobacterium*  
660 *longum* BB536 and acetate-converting, butyrate-producing colon bacteria during growth on  
661 oligofructose. *Appl Environ Microbiol.* 2006;72: 7835–41. doi:10.1128/AEM.01296-06  
662



- 663 12. Zelezniak A, Andrejev S, Ponomarova O, Mende DR, Bork P, Patil KR. Metabolic dependencies  
664 drive species co-occurrence in diverse microbial communities. *Proc Natl Acad Sci*. 2015;112:  
665 6449–6454. doi:10.1073/pnas.1421834112  
666
- 667 13. McCutcheon JP, McDonald BR, Moran NA. Convergent evolution of metabolic roles in bacterial  
668 co-symbionts of insects. *Proc Natl Acad Sci U S A*. 2009;106: 15394–9.  
669 doi:10.1073/pnas.0906424106  
670
- 671 14. McCutcheon JP, Moran NA. Parallel genomic evolution and metabolic interdependence in an  
672 ancient symbiosis. *Proc Natl Acad Sci U S A*. 2007;104: 19392–7. doi:10.1073/pnas.0708855104  
673
- 674 15. Van Leuven JT, Meister RC, Simon C, McCutcheon JP. Sympatric Speciation in a Bacterial  
675 Endosymbiont Results in Two Genomes with the Functionality of One. *Cell*. 2014;158: 1270–  
676 1280. doi:10.1016/j.cell.2014.07.047  
677
- 678 16. Opatovsky I, Santos-Garcia D, Lahav T, Ofaim S, Mouton L, Barbe V, et al. Modeling trophic  
679 dependencies and exchanges among insects' bacterial symbionts in a host-simulated environment.  
680 *bioRxiv*. 2016; doi:10.1101/086165  
681
- 682 17. Wintermute EH, Silver PA. Emergent cooperation in microbial metabolism. *Mol Syst Biol*.  
683 2010;6. doi:10.1038/msb.2010.66  
684
- 685 18. Mee MT, Collins JJ, Church GM, Wang HH. Syntrophic exchange in synthetic microbial  
686 communities. *Proc Natl Acad Sci U S A*. 2014;111: E2149–56. doi:10.1073/pnas.1405641111  
687
- 688 19. Pande S, Merker H, Bohl K, Reichelt M, Schuster S, de Figueiredo LF, et al. Fitness and stability  
689 of obligate cross-feeding interactions that emerge upon gene loss in bacteria. *ISME J*. 2014;8:  
690 953–62. doi:10.1038/ismej.2013.211  
691
- 692 20. Shou W, Ram S, Vilar JMG. Synthetic cooperation in engineered yeast populations. *Proc Natl*  
693 *Acad Sci* . 2007;104 : 1877–1882. doi:10.1073/pnas.0610575104  
694
- 695 21. Hom EFY, Murray AW. Niche engineering demonstrates a latent capacity for fungal-algal  
696 mutualism. *Science*. 2014;345: 94–98. doi:10.1126/science.1253320  
697
- 698 22. Foster KR, Wenseleers T. A general model for the evolution of mutualisms. *J Evol Biol*. 2006;19:  
699 1283–93. doi:10.1111/j.1420-9101.2005.01073.x  
700
- 701 23. Nowak MA. Five rules for the evolution of cooperation. *Science*. 2006;314: 1560–3.  
702 doi:10.1126/science.1133755  
703

- 704 24. Morris JJ. Black Queen evolution: the role of leakiness in structuring microbial communities.  
705 Trends Genet. 2015;31: 475–482. doi:10.1016/j.tig.2015.05.004  
706
- 707 25. D’Souza G, Waschina S, Pande S, Bohl K. Less is more: selective advantages can explain the  
708 prevalent loss of biosynthetic genes in bacteria. Evolution. 2014;68: 2559–70.  
709 doi:10.1111/evo.12468  
710
- 711 26. Bennett GM, Moran NA. Heritable symbiosis: The advantages and perils of an evolutionary rabbit  
712 hole. Proc Natl Acad Sci. 2015;112: 10169–10176. doi:10.1073/pnas.1421388112  
713
- 714 27. McCutcheon JP, Moran NA. Extreme genome reduction in symbiotic bacteria. Nat Rev Microbiol.  
715 2011;10: 13–26. doi:10.1038/nrmicro2670  
716
- 717 28. Moran NA, Bennett GM. The Tiniest Tiny Genomes. Annu Rev Microbiol. 2014;68: 195–215.  
718 doi:10.1146/annurev-micro-091213-112901  
719
- 720 29. Treves DS, Manning S, Adams J. Repeated evolution of an acetate-crossfeeding polymorphism in  
721 long-term populations of Escherichia coli. Mol Biol Evol. 1998;15: 789–797.  
722 doi:10.1093/oxfordjournals.molbev.a025984  
723
- 724 30. Rosenzweig RF, Sharp RR, Treves DS, Adams J. Microbial evolution in a simple unstructured  
725 environment: Genetic differentiation in Escherichia coli. Genetics. 1994;137: 903–917.  
726
- 727 31. Hillesland KL, Stahl DA. Rapid evolution of stability and productivity at the origin of a microbial  
728 mutualism. Proc Natl Acad Sci U S A. 2010;107: 2124–2129. doi:10.1073/pnas.0908456107  
729
- 730 32. Hillesland KL, Lim S, Flowers JJ, Turkarslan S, Pinel N, Zane GM, et al. Erosion of functional  
731 independence early in the evolution of a microbial mutualism. Proc Natl Acad Sci U S A.  
732 2014;111: 14822–7. doi:10.1073/pnas.1407986111  
733
- 734 33. Oliveira NM, Niehus R, Foster KR. Evolutionary limits to cooperation in microbial communities.  
735 Proc Natl Acad Sci. 2014;111: 17941–17946. doi:10.1073/pnas.1412673111  
736
- 737 34. Frank SA. Genetics of Mutualism: The Evolution of Altruism between Species. J Theor Biol.  
738 1994;170: 393–400. doi:10.1006/jtbi.1994.1200  
739
- 740 35. Bull JJ, Harcombe WR. Population dynamics constrain the cooperative evolution of cross-feeding.  
741 PLoS One. 2009;4: e4115. doi:10.1371/journal.pone.0004115  
742
- 743 36. Pál C, Papp B, Lercher MJ, Csermely P, Oliver SG, Hurst LD. Chance and necessity in the  
744 evolution of minimal metabolic networks. Nature. 2006;440: 667–70. doi:10.1038/nature04568

- 745
- 746 37. Chiu H-C, Levy R, Borenstein E. Emergent Biosynthetic Capacity in Simple Microbial  
747 Communities. *PLoS Comput Biol.* 2014;10: e1003695. doi:10.1371/journal.pcbi.1003695  
748
- 749 38. Orth J, Thiele I, Palsson B. What is flux balance analysis? *Nat Biotechnol.* 2010;28: 245–248.  
750 doi:10.1038/nbt.1614  
751
- 752 39. Hudson GS, Wong V, Davidson BE. Chorismate mutase/prephenate dehydrogenase from  
753 *Escherichia coli* K12: purification, characterization, and identification of a reactive cysteine.  
754 *Biochemistry.* 1984;23: 6240–9.  
755
- 756 40. Belfort M, Maley GF, Maley F. Characterization of the *Escherichia coli* thyA gene and its  
757 amplified thymidylate synthetase product. *Proc Natl Acad Sci U S A.* 1983;80: 1858–61.  
758 Available: <http://www.pnas.org/content/80/7/1858.abstract>  
759
- 760 41. Fricke J, Neuhard J, Kelln RA, Pedersen S. The cmk gene encoding cytidine monophosphate  
761 kinase is located in the rpsA operon and is required for normal replication rate in *Escherichia coli*.  
762 *J Bacteriol.* 1995;177: 517–23. Available: <http://jb.asm.org/content/177/3/517.abstract>  
763
- 764 42. Wu D, Daugherty SC, Van Aken SE, Pai GH, Watkins KL, Khouri H, et al. Metabolic  
765 complementarity and genomics of the dual bacterial symbiosis of sharpshooters. *PLoS Biol.*  
766 2006;4: e188. doi:10.1371/journal.pbio.0040188  
767
- 768 43. Maughan H, Callicotte V, Hancock A, Birky CW, Nicholson WL, Masel J. The population  
769 genetics of phenotypic deterioration in experimental populations of *Bacillus subtilis*. *Evolution.*  
770 2006;60: 686–695. doi:10.1111/j.0014-3820.2006.tb01148.x  
771
- 772 44. Russell JB, Diez-Gonzalez F. The effects of fermentation acids on bacterial growth. *Adv Microb*  
773 *Physiol.* 1998;39: 205–34. Available: <http://www.ncbi.nlm.nih.gov/pubmed/9328648>  
774
- 775 45. Gómez-Valero L, Rocha EPC, Latorre A, Silva FJ. Reconstructing the ancestor of *Mycobacterium*  
776 *leprae*: the dynamics of gene loss and genome reduction. *Genome Res.* 2007;17: 1178–85.  
777 doi:10.1101/gr.6360207  
778
- 779 46. Nilsson AI, Koskiniemi S, Eriksson S, Kugelberg E, Hinton JCD, Andersson DI. Bacterial genome  
780 size reduction by experimental evolution. *Proc Natl Acad Sci U S A.* 2005;102: 12112–6.  
781 doi:10.1073/pnas.0503654102  
782
- 783 47. Großkopf T, Consuegra J, Gaffé J, Willison JC, Lenski RER, Soyer OSO, et al. Metabolic  
784 modelling in a dynamic evolutionary framework predicts adaptive diversification of bacteria in a  
785 long-term evolution experiment. *BMC Evol Biol.* 2016;16: 163. doi:10.1186/s12862-016-0733-x  
786

- 787 48. Harcombe WR, Riehl WJ, Dukovski I, Granger BR, Betts A, Lang AH, et al. Metabolic Resource  
788 Allocation in Individual Microbes Determines Ecosystem Interactions and Spatial Dynamics. *Cell*  
789 *Rep.* 2014;7: 1104–15. doi:10.1016/j.celrep.2014.03.070  
790
- 791 49. Klitgord N, Segrè D. Environments that Induce Synthetic Microbial Ecosystems. *PLoS Comput*  
792 *Biol.* 2010;6. doi:10.1371/Citation  
793
- 794 50. Feist AM, Henry CS, Reed JL, Krummenacker M, Joyce AR, Karp PD, et al. A genome-scale  
795 metabolic reconstruction for *Escherichia coli* K-12 MG1655 that accounts for 1260 ORFs and  
796 thermodynamic information. *Mol Syst Biol.* 2007;3: 121. doi:10.1038/msb4100155  
797
- 798 51. Sambrook J, Fritsch EF, Maniatis T. *Molecular Cloning: A Laboratory Manual*. Second edi. Cold  
799 Spring Harbor, New York: Cold Spring Harbor Laboratory Press; 1989.  
800
- 801 52. Kanehisa M, Goto S. KEGG: Kyoto Encyclopedia of Genes and Genomes. *Nucleic Acids Res.*  
802 2000;28: 27–30. doi:10.1093/nar/28.1.27  
803
- 804 53. Benjamini Y, Hochberg Y. Controlling the False Discovery Rate: A Practical and Powerful  
805 Approach to Multiple Testing. *J R Stat Soc Ser B.* 1995;57: 289–300. Available:  
806 <http://www.jstor.org/stable/2346101>  
807
